# Supplementary material
Source: PubMed Central journal article supplement (PMC3457330)
Supplement: JVI.01336-12_zjv999096555so1.pdf [file JVI.01336-12_zjv999096555so1.pdf]

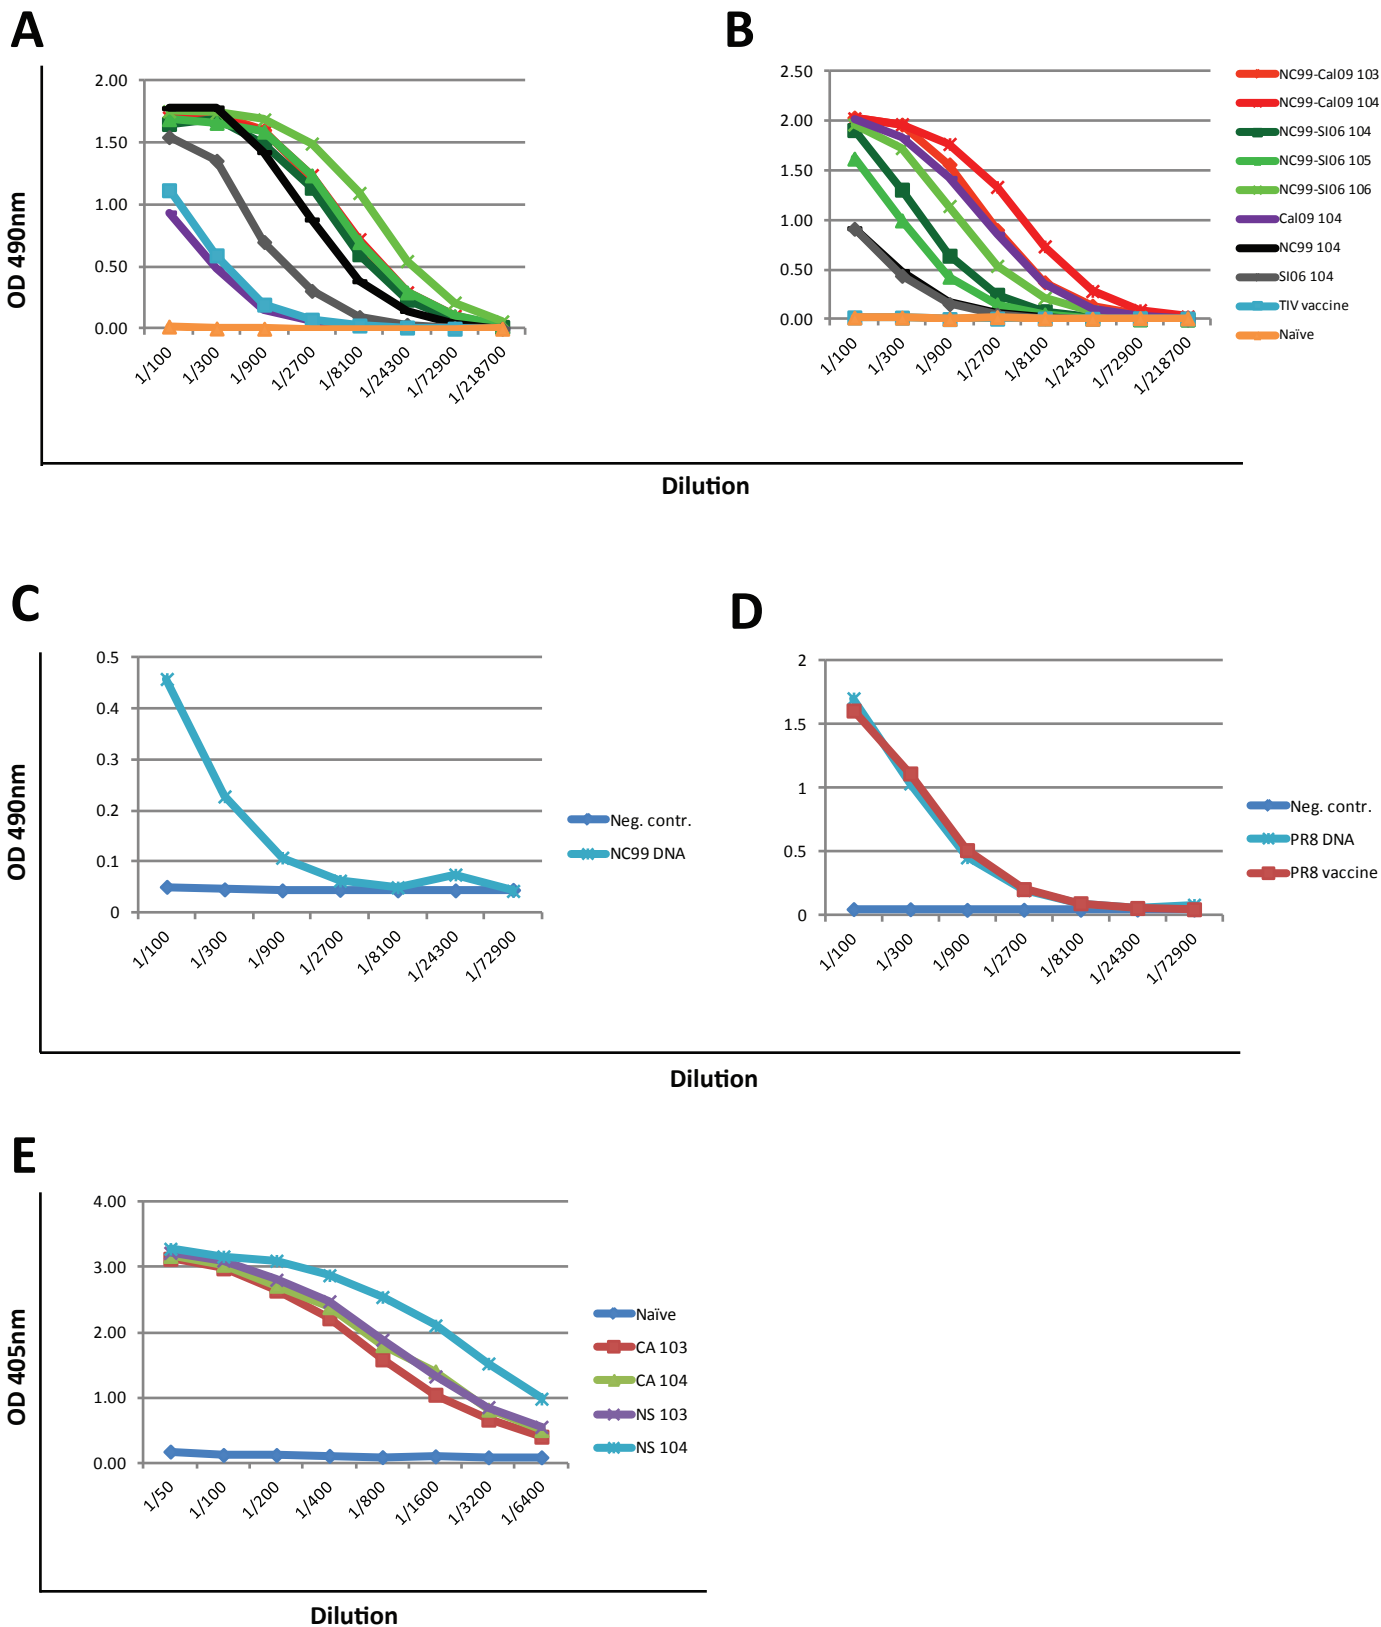

**Supplementary Figure 1: Conversion of tested sera by ELISA.** (A) Reactivity of prime-boost (NC99 and SI06 or NC99 and Cal09) and prime-only (Cal09, NC99, SI06, TIV) animals to recombinant NC99 hemagglutinin. (B) Reactivity of prime-boost (NC99 and SI06 or NC99 and Cal09) and prime-only (Cal09, NC99, SI06, TIV) animals to recombinant Cal09 hemagglutinin by ELISA. (C) Reactivity of sera from NC99 HA DNA (NC99 DNA) vaccinated animals to recombinant NC99 hemagglutinin. (D) Reactivity of sera from PR8 HA DNA (PR8 DNA) or inactivated PR8 virus (PR8 vaccine) vaccinated animals to recombinant PR8 hemagglutinin. (E) Reactivity of sera from animals vaccinated with cold-adapted (CA) and NS-attenuated (NS) to purified PR8 virus.
